# Supplementary material for: Patched regulates lipid homeostasis by controlling cellular cholesterol levels
Source: PubMed Central journal article supplement (PMC8361143; doi:10.1038/s41467-021-24995-9), 2021-08-12
Supplement: 41467_2021_24995_MOESM3_ESM.pdf [file 41467_2021_24995_MOESM3_ESM.pdf]

## **Description of Additional Supplementary Files**

File Name: Supplementary Movie 1

Description: Mock ER-3D reconstruction. In a FIB-SEM Z-stack ER was identified by iLastik training. ER structures showed a reticulated morphology. Scale bar 0.4  $\mu\text{m}$ .

File Name: Supplementary Movie 2

Description: ptc-3(RNAi) ER-3D reconstruction. In a FIB-SEM Z-stack ER was identified by iLastik training. Upon ptc-3(RNAi) ER-sheets were identified. Scale bar 0.4  $\mu\text{m}$ .
